# Supplementary material for: Development of a Colorimetric Sensor for Autonomous, Networked, Real-Time Application
Source: MDPI journal article supplement (doi:10.3390/s20205857), 2020-10-16
Supplement: s1 [file s1]

# Development of a Colorimetric Sensor for Autonomous, Networked, Real-Time Application

Brandy J Johnson \*, Anthony P Malanoski and Jeffrey S Erickson

Center for Bio/Molecular Science & Engineering, US Naval Research Laboratory, Washington, DC 20375, USA; anthony.malanoski@nrl.navy.mil (A.P.M.); jeffrey.erickson@nrl.navy.mil (J.S.E.)

\* Correspondence: brandy.white@nrl.navy.mil; Tel.: +1-202-404-6100

Received: 15 September 2020; Accepted: 9 October 2020; Published: date

This supporting information provides additional detail on the ABEAM-6 prototype sensing devices including additional images and a block electronics diagram.

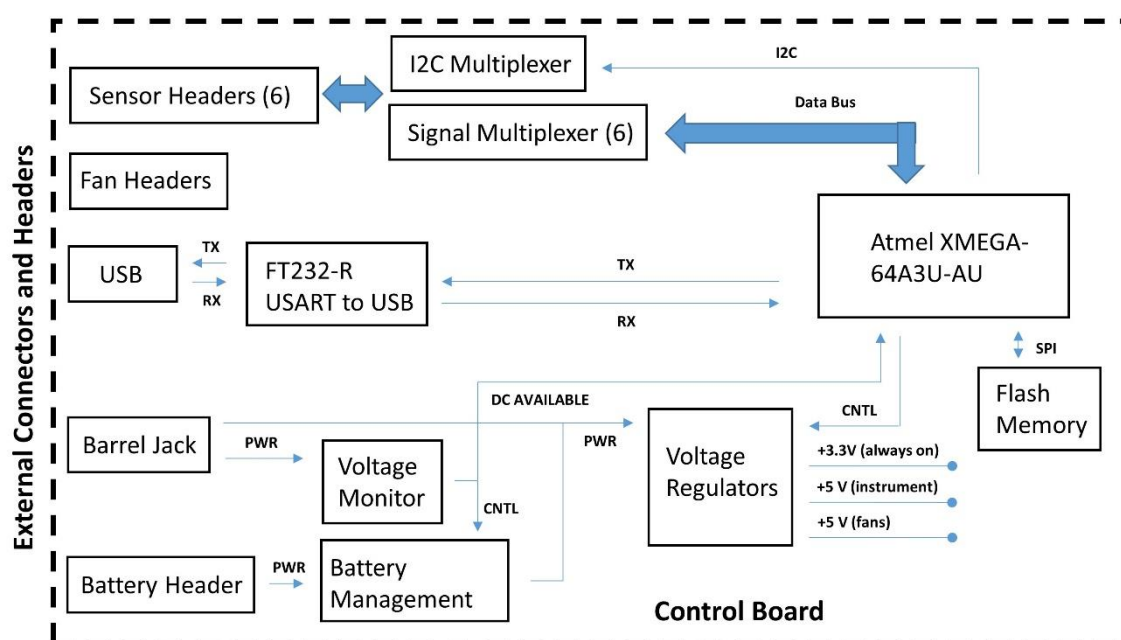

**Figure S1.** Block diagram for the ABEAM-6 prototype sensor [101].

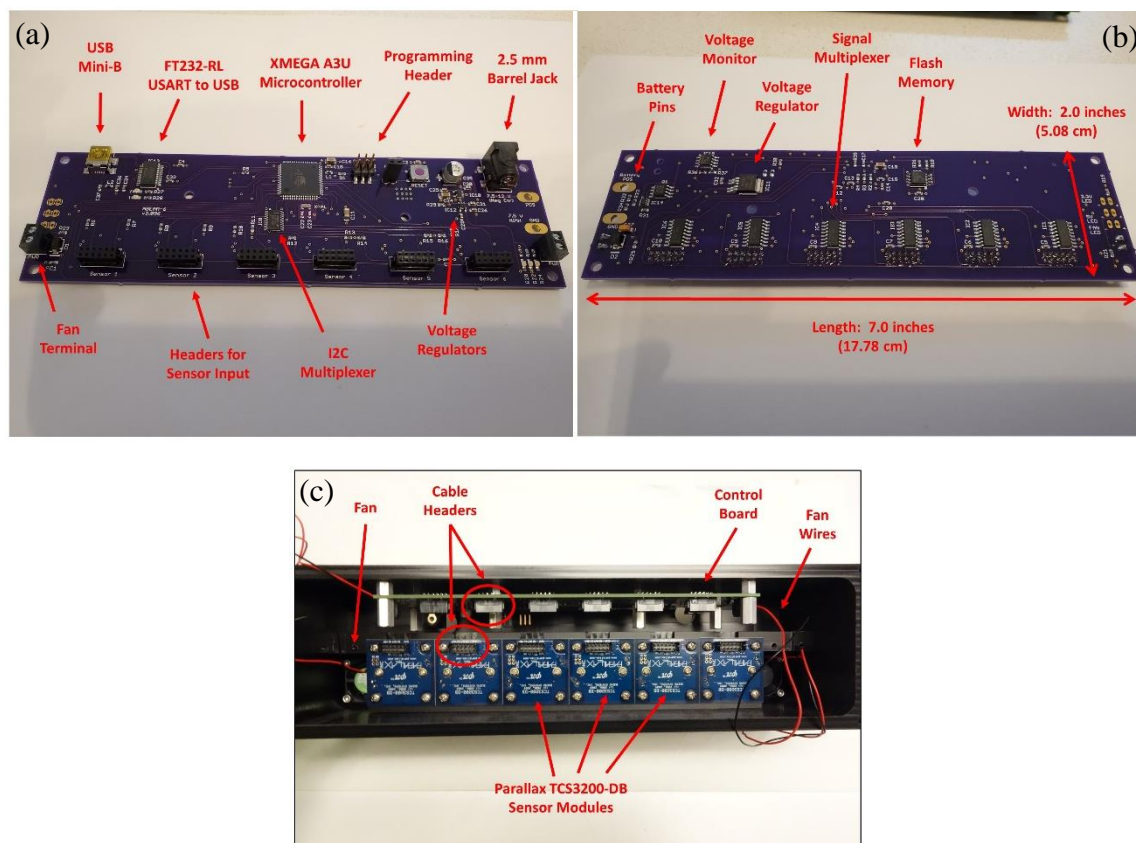

**Figure S2.** The ABEAM-6 control board is 7.0" long  $\times$  2.0" wide (17.78 cm  $\times$  5.08 cm). Selected components and dimensions have been labeled. (a) Front side. (b) Back side. (c) Control board mounted in a partially assembled housing (top view). Two fans and six Parallax TCS3200-DB sensors have been added. The cables that connect the sensors to the board have been removed for clarity [101].

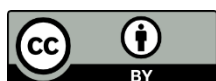

© 2020 by the authors. Submitted for possible open access publication under the terms and conditions of the Creative Commons Attribution (CC BY) license (<http://creativecommons.org/licenses/by/4.0/>).
